# Supplementary material
Source: PubMed Central journal article supplement (PMC10992120)

S1A

**Lymphocyte score vs PD-L1**  
( $R=0.423$ ;  $p=1.02e-15$ )

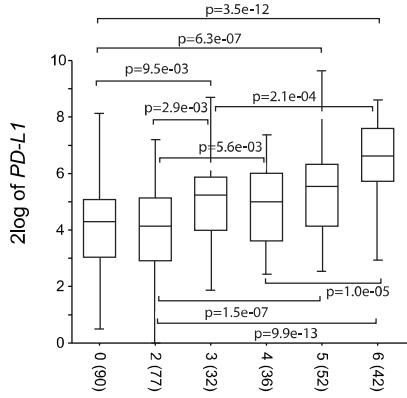

S1B

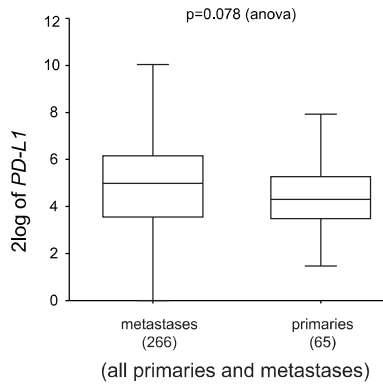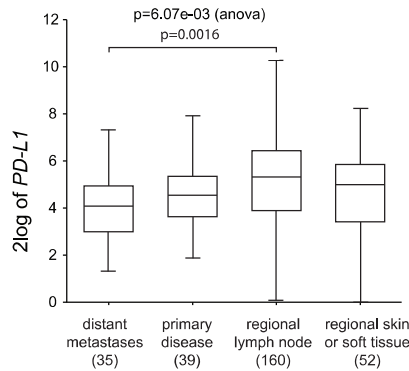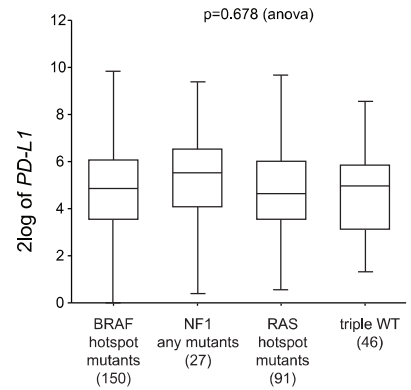

S1C

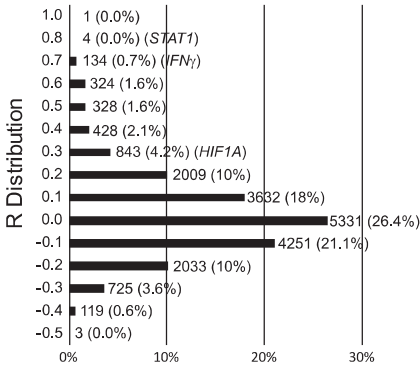

S1D

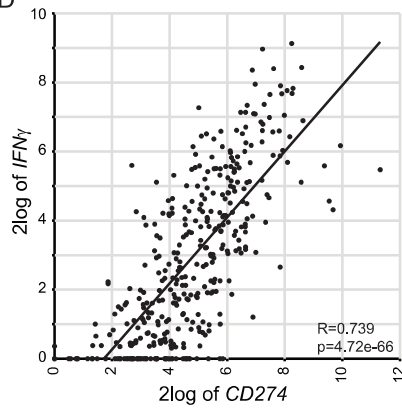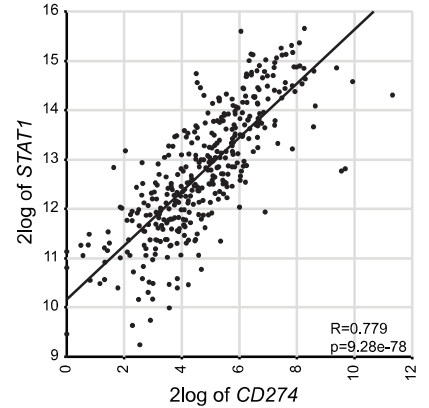

S1E

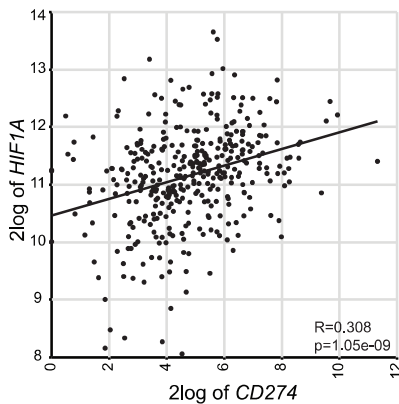

S1F

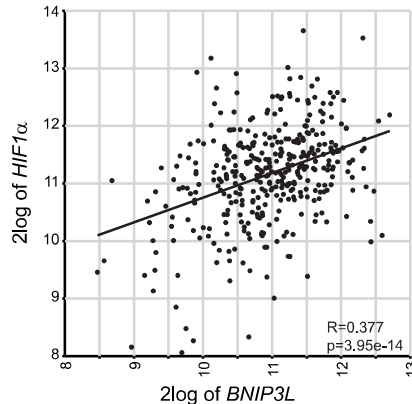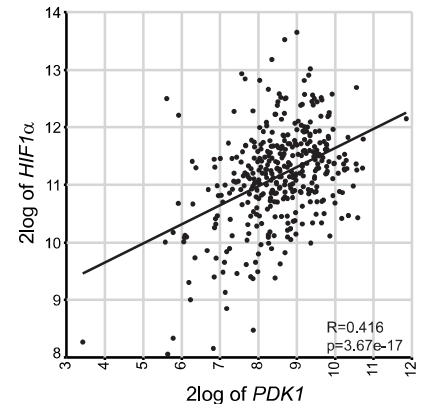

# Supplemental Figure S2

S2A

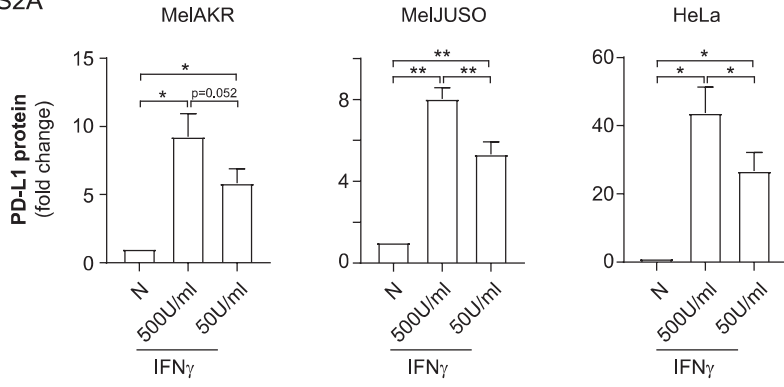

S2B

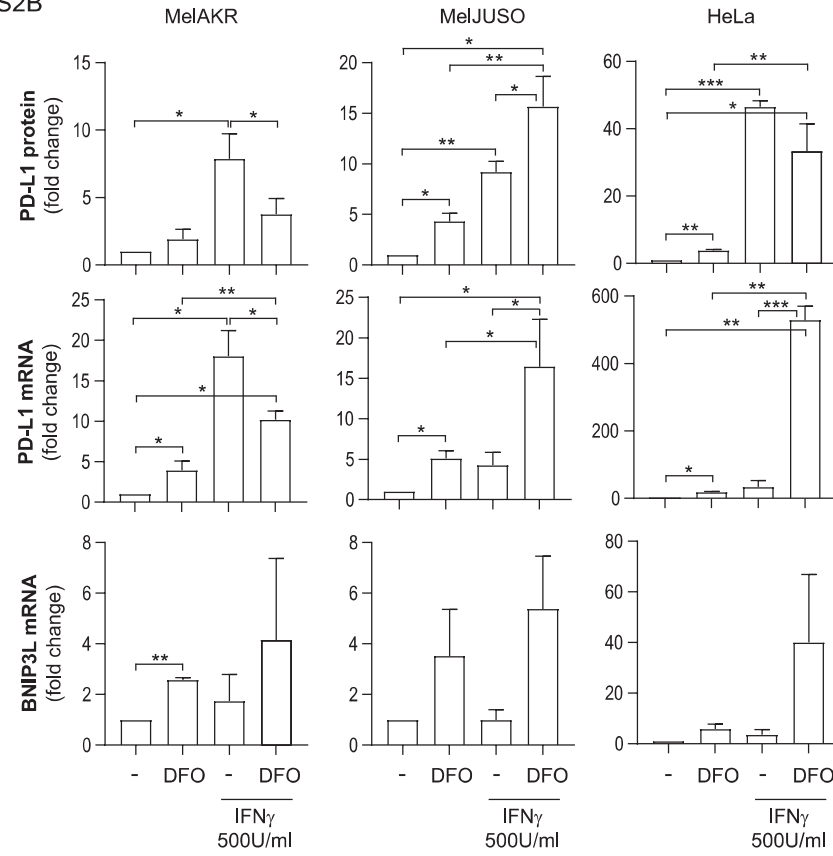

S2C

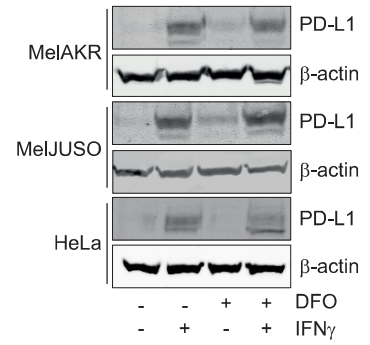

Supplemental Figure S3

S3A

| Correlation <i>CD274</i> mRNA with Geneset Signature Expression | R     | p-value  |
|-----------------------------------------------------------------|-------|----------|
| <b>Melanoma cells (2018 cells)</b>                              |       |          |
| JAK_STAT_Signaling_Pathway (KEGG)                               | 0.169 | 2.47e-14 |
| HIF_1_signaling_pathway (KEGG)                                  | 0.119 | 7.79e-08 |
| <b>Tumor 110 (258 cells)</b>                                    |       |          |
| JAK_STAT_Signaling_Pathway (KEGG)                               | 0.537 | 1.03e-20 |
| HIF_1_signaling_pathway (KEGG)                                  | 0.271 | 9.85e-06 |
| <b>Macrophage (420 cells)</b>                                   |       |          |
| JAK_STAT_Signaling_Pathway (KEGG)                               | 0.122 | 0.012    |
| HIF_1_signaling_pathway (KEGG)                                  | 0.031 | 0.521    |

S3B

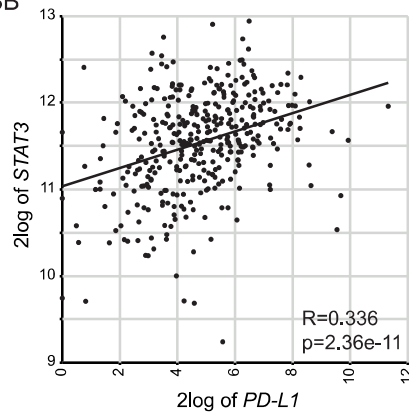

Supplement: 262_2021_3007_MOESM1_ESM.pdf [file 262_2021_3007_MOESM1_ESM.pdf]
